# Supplementary material for: A New Methodology for Early Detection of Failures in Lithium-Ion Batteries
Source: MDPI journal article supplement (doi:10.3390/en16031073), 2023-01-18
Supplement: s1 [file s1]

A dark blue outline of a house, consisting of a triangular roof and a rectangular base. The letters 'MDPI' are centered within the house shape.

**MDPI**
