# Supplementary material for: A New Methodology for Early Detection of Failures in Lithium-Ion Batteries
Source: MDPI journal article supplement (doi:10.3390/en16031073), 2023-01-18
Supplement: s1 [file s1]

## Article

# Supplementary Material of: A New Methodology for Early Detection of Failures in Lithium-Ion Batteries

Mario Eduardo Carbonó dela Rosa <sup>1</sup>, Graciela Velasco Herrera <sup>2\*</sup>, Rocío Nava <sup>1</sup>, Enrique Quiroga González <sup>3</sup>, Rodolfo Sosa Echeverría <sup>4</sup>, Pablo Sánchez Álvarez <sup>4</sup>, Jaime Gandarilla Ibarra <sup>5</sup>, and Víctor Manuel Velasco Herrera <sup>6</sup>

<sup>1</sup> Instituto de Energías Renovables, Universidad Nacional Autónoma de México, Temixco 3462580, Mexico

<sup>2</sup> Instituto de Ciencias Aplicadas y Tecnología, Universidad Nacional Autónoma de México, Ciudad Universitaria, Coyoacán, Mexico City 04510, Mexico

<sup>3</sup> Instituto de Física, Benemérita Universidad Autónoma de Puebla (BUAP), Puebla 72570, Mexico

<sup>4</sup> Instituto de Ciencias de la Atmósfera y Cambio Climático, Universidad Nacional Autónoma de México, Circuito Exterior, C.U., Coyoacán, Mexico City 04510, Mexico

<sup>5</sup> Facultad de Ingeniería, Universidad Nacional Autónoma de México, Circuito Exterior, C.U., Coyoacán, Mexico City 04510, Mexico

<sup>6</sup> Instituto de Geofísica, Universidad Nacional Autónoma de México, Circuito Exterior, C.U., Coyoacán, Mexico City 04510, Mexico

\* Correspondence: graciela.velasco@icat.unam.mx

## Supplementary Material

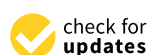

**Citation:** Carbonó dela Rosa, M.E.; Velasco Herrera, G.; Nava, R.; Quiroga González, E.; Sosa Echeverría, R.; Sánchez Álvarez, P.; Gandarilla Ibarra, J.; Velasco Herrera, V.M. A New Methodology for Early Detection of Failures in Lithium-Ion Batteries. *Energies* **2023**, *1*, 0.  
<https://doi.org/>

Academic Editor: Jiangtao Hu

Received: 8 December 2022

Revised: 9 January 2023

Accepted: 10 January 2023

Published: 18 January 2023

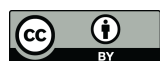

**Copyright:** © 2023 by the authors. Licensee MDPI, Basel, Switzerland. This article is an open access article distributed under the terms and conditions of the Creative Commons Attribution (CC BY) license (<https://creativecommons.org/licenses/by/4.0/>).

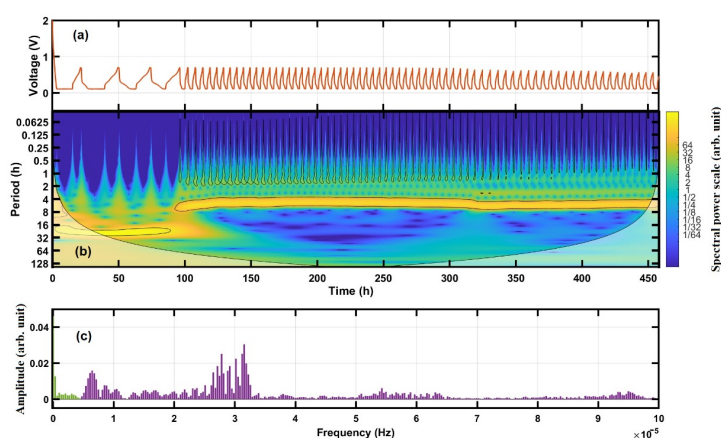

**Figure S1.** (a) Voltage, (b) wavelet spectral power, and (c) and Fourier spectra of the cycling test performed by IF-BUAP to HC1 cell.

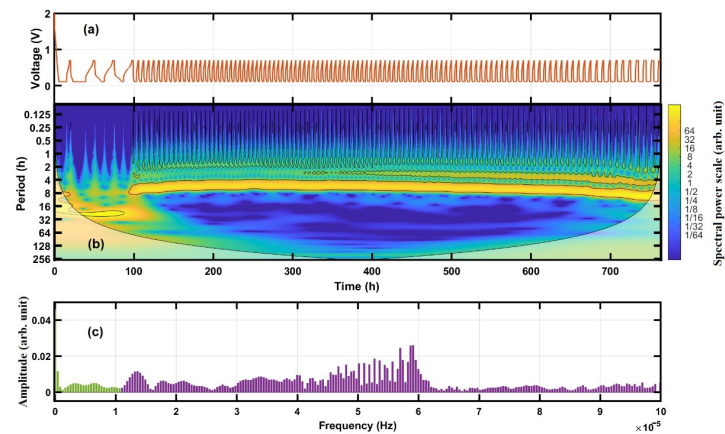

**Figure S2.** (a) Voltage, (b) wavelet spectral power, and (c) Fourier spectra of the cycling test performed by IF-BUAP to HC2 cell.

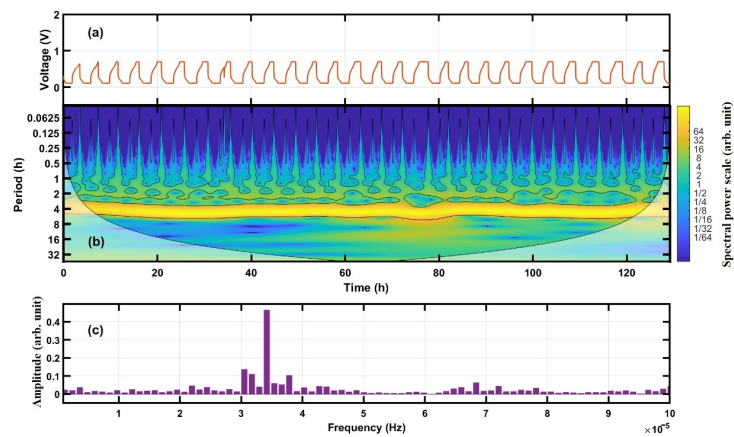

**Figure S3.** (a) Voltage, (b) wavelet spectral power, and (c) Fourier spectra of the cycling test performed by IF-BUAP to HC4 cell.

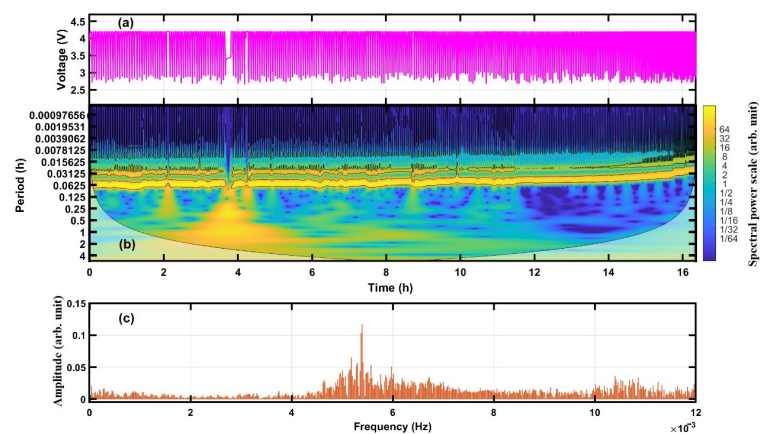

**Figure S4.** (a) Voltage, (b) wavelet spectral power, and (c) Fourier spectra of the cycling test performed by CALCE to the prismatic cell tested a 35°C (PC-35C).

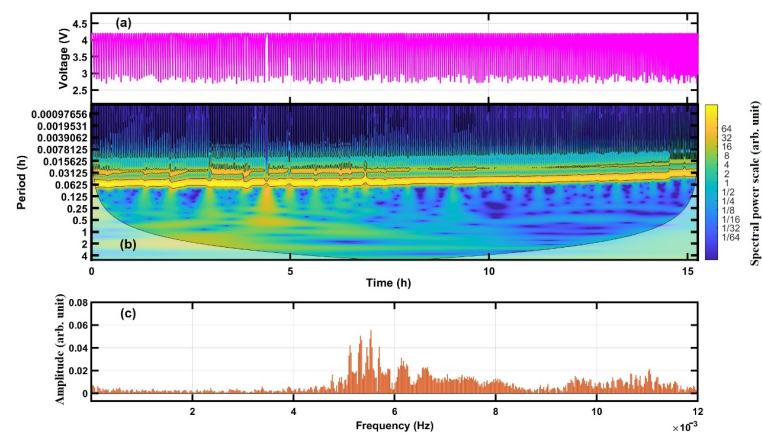

**Figure S5.** (a) Voltage, (b) wavelet spectral power, and (c) Fourier spectra of the cycling test performed by CALCE to the prismatic cell tested at  $45^{\circ}\text{C}$  (PC-45C).

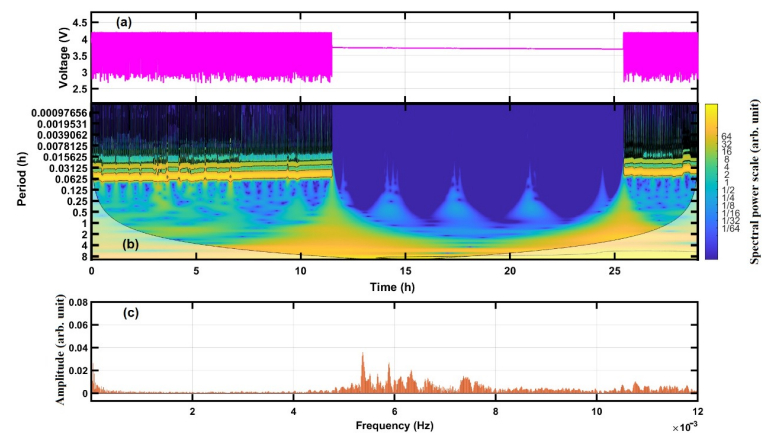

**Figure S6.** (a) Voltage, (b) wavelet spectral power, and (c) Fourier spectra of the cycling test performed by CALCE to the prismatic cell tested at  $55^{\circ}\text{C}$  (PC-55C).

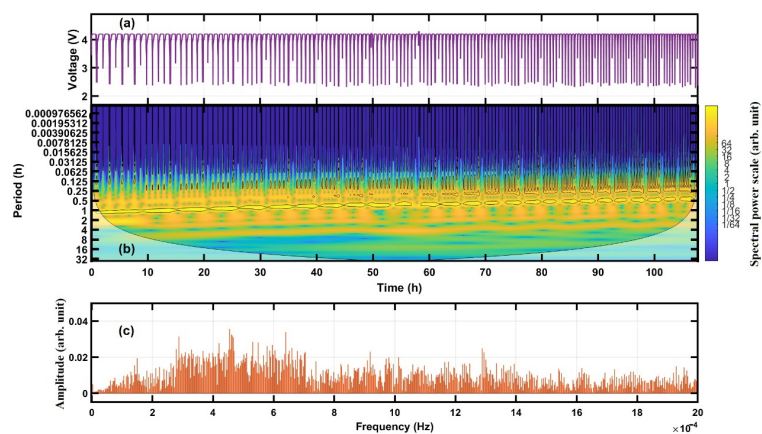

**Figure S7.** (a) Voltage, (b) wavelet spectral power, and (c) Fourier spectra of the cycling test performed by NASA-PCE to commercial lithium-ion cells (C-LIC1).

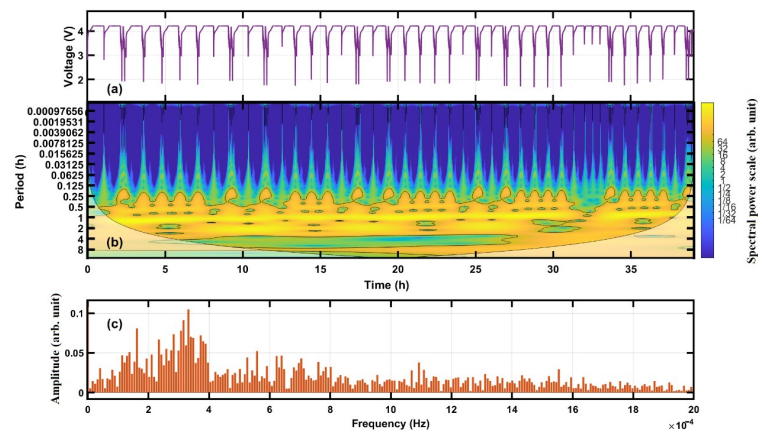

**Figure S8.** (a) Voltage, (b) wavelet spectral power, and (c) Fourier spectra of the cycling test performed by NASA-PCE to commercial lithium-ion cells (C-LIC2).

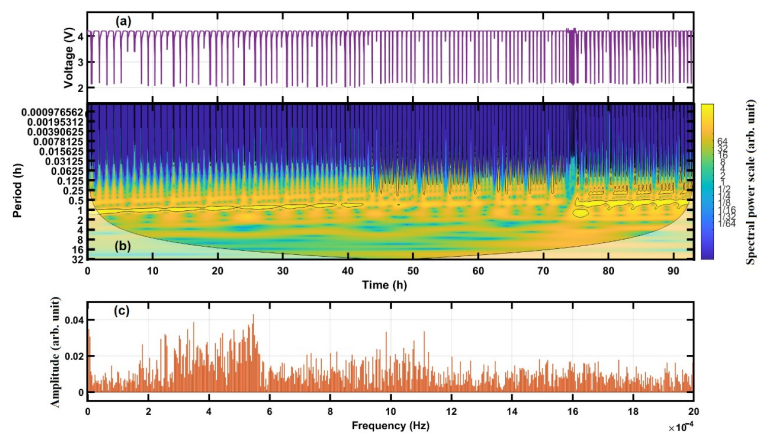

**Figure S9.** (a) Voltage, (b) wavelet spectral power, and (c) Fourier spectra of the cycling test performed by NASA-PCE to commercial lithium-ion cells (C-LIC4).

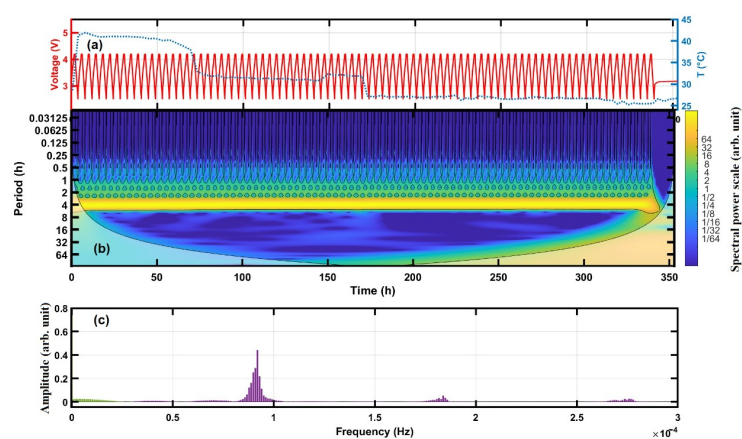

**Figure S10.** (a) Voltage and cell temperature, (b) wavelet spectral power, and (c) Fourier spectra of the cycling test performed by UCL to one commercial cylindrical battery from the 1 to 84 cycles (CC3500-1).

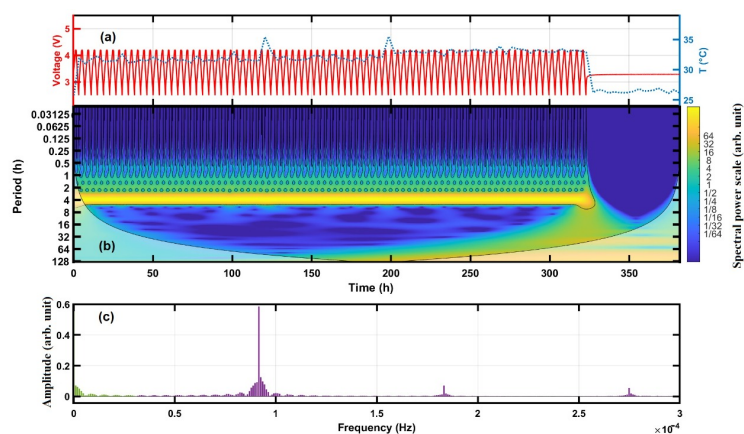

**Figure S11.** (a) Voltage and cell temperature, (b) wavelet spectral power, and (c) Fourier spectra of the cycling test performed by UCL to one commercial cylindrical battery from the 203 to 285 cycles (CC3500-3).

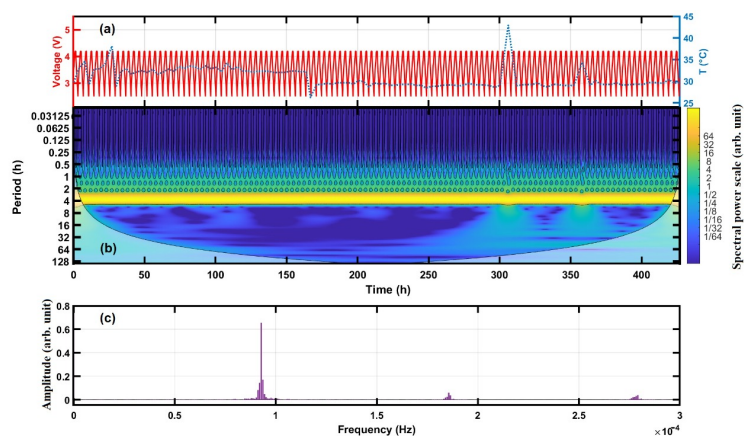

**Figure S12.** (a) Voltage and cell temperature, (b) wavelet spectral power, and (c) Fourier spectra of the cycling test performed by UCL to one commercial cylindrical battery from the 286 to 400 cycles (CC3500-4).
