# Supplementary figures and images for: A New Methodology for Early Detection of Failures in Lithium-Ion Batteries
Source: MDPI journal article supplement (doi:10.3390/en16031073), 2023-01-18

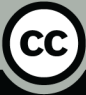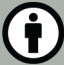

BY

Supplement: s1 [file s1]

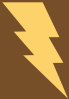

*energies*

Supplement: s1 [file s1]

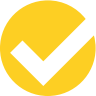

check for  
updates

Supplement: s1 [file s1]
